# Supplementary material
Source: publisher figshare collection journal article supplement (https://acs.figshare.com/ndownloader/files/4976035)
Supplement: Supplementary file 1 [file 4976035]

# Robust Density-Based Clustering to Identify Metastable Conformational States of Proteins – Supporting Information –

Florian Sittel and Gerhard Stock  
*Biomolecular Dynamics, Institute of Physics,  
Albert Ludwigs University, 79104 Freiburg, Germany*

(Dated: April 6, 2016)

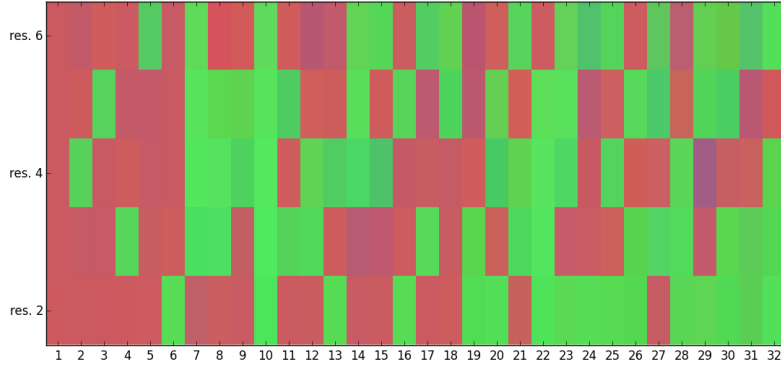

Figure S1: Ramacolor plot of Ala<sub>7</sub>, showing the dihedral angle content of its 32 metastable states. Red residues indicate  $\beta$ -sheet, green residues indicate  $\alpha$ -helical conformations.

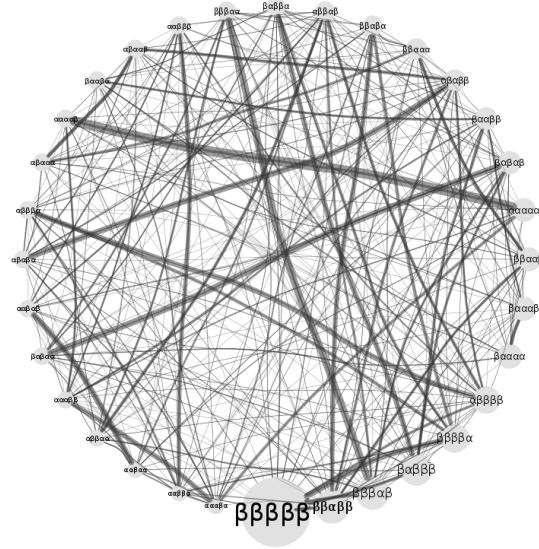

Figure S2: Transition network of Ala<sub>7</sub>. States are ordered counter-clockwise by population. Edge-thickness scales by transition rates, node sizes correspond to state populations. Node labels denote the dihedral conformation of the state, with residues either in  $\beta$ - or  $\alpha$ -conformation. The network shows clearly that Ala<sub>7</sub> dynamics are essentially uncorrelated.

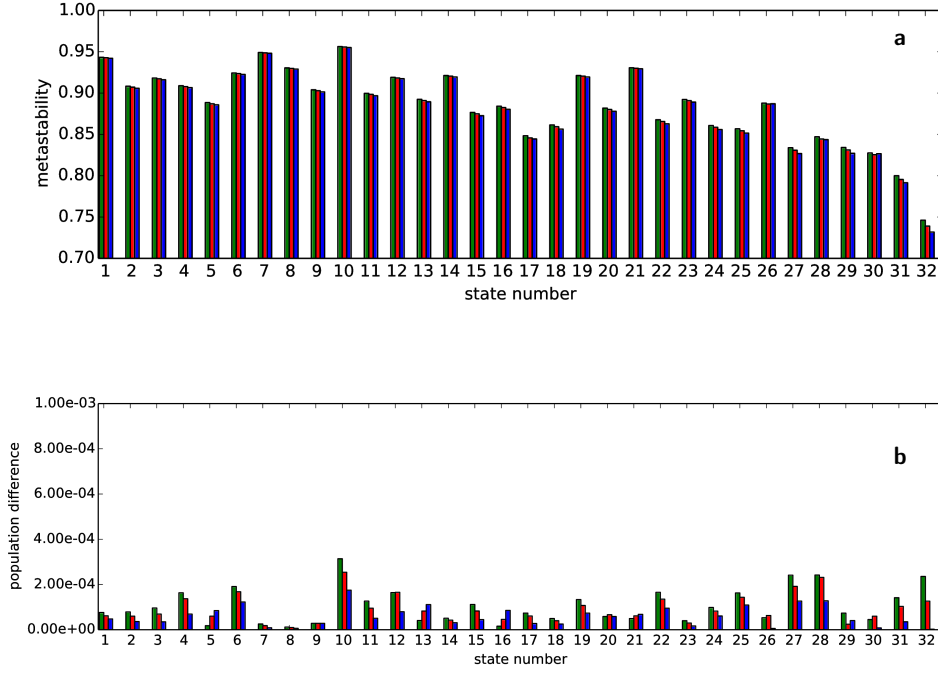

Figure S3: Verification of Chapman-Kolmogorov equation for Ala<sub>7</sub>. Top diagram (a) shows metastabilities  $T_{ii}^{20 \text{ ps}/\tau}(\tau)$  after propagation to 20 ps for  $\tau = 1$  ps (green),  $\tau = 5$  ps (red) and  $\tau = 10$  ps (blue). Bottom diagram (b) shows differences in population after propagation of an initially equally distributed population  $\mathbf{p}$ . Compared are the same lag times as in (a) to a propagation with  $T(\tau = 20 \text{ ps})$ , i.e., pop. diff.  $\equiv \|\mathbf{p}T^{20 \text{ ps}/\tau}(\tau) - \mathbf{p}T(\tau = 20 \text{ ps})\|$ .

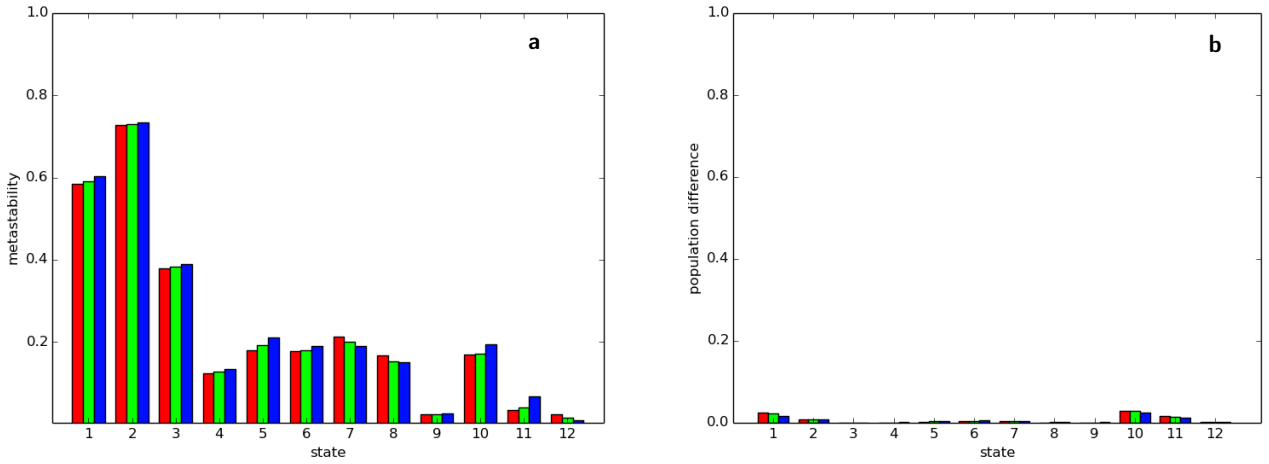

Figure S4: Verification of Chapman-Kolmogorov equation for HP-35. **a:** Metastabilities  $T_{ii}^{160 \text{ ns}/\tau}(\tau)$  after propagation to 160 ns for  $\tau = 10$  ns (green),  $\tau = 20$  ns (red) and  $\tau = 40$  ns (blue). **b:** Differences (relative) in population after propagation of an initially equally distributed population  $\mathbf{p}$ . Compared are the same lag times as in (a) to a propagation with  $T(\tau = 160 \text{ ns})$ , i.e., pop. diff.  $\equiv \|\mathbf{p}T^{160 \text{ ns}/\tau}(\tau) - \mathbf{p}T(\tau = 160 \text{ ns})\|$

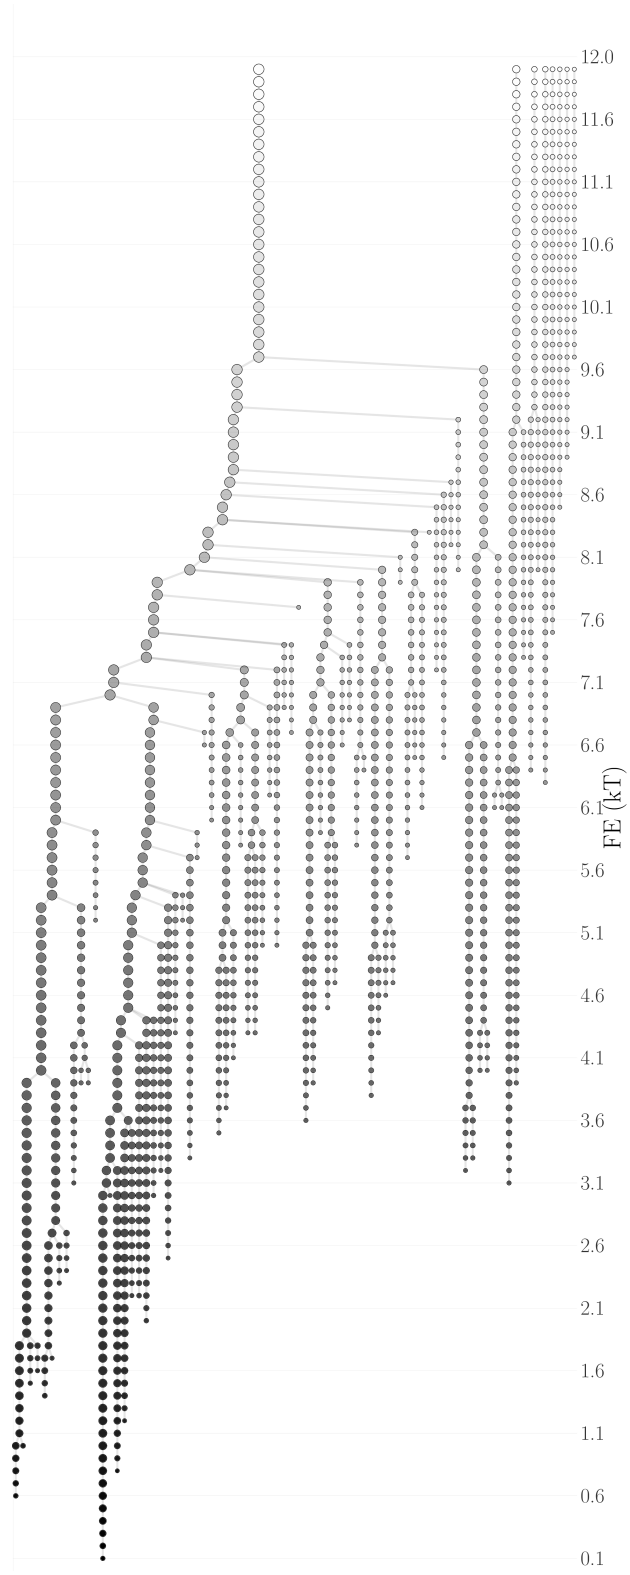

Figure S5: Density network for BPTI with free energy levels from 0.1 kT to 12.0 kT in steps of 0.1 kT.

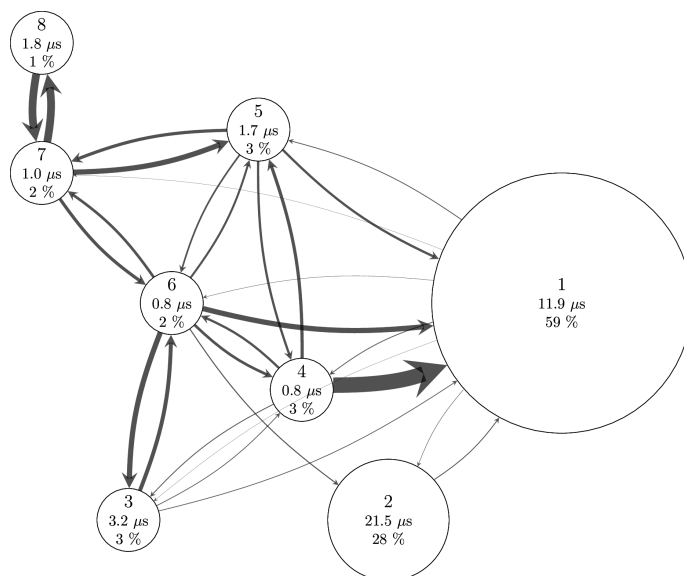

Figure S6: Markov state model of BPTI resulting from density-based geometric clustering and successive dynamical clustering via MPP on reduced dihedral-angle PCs.

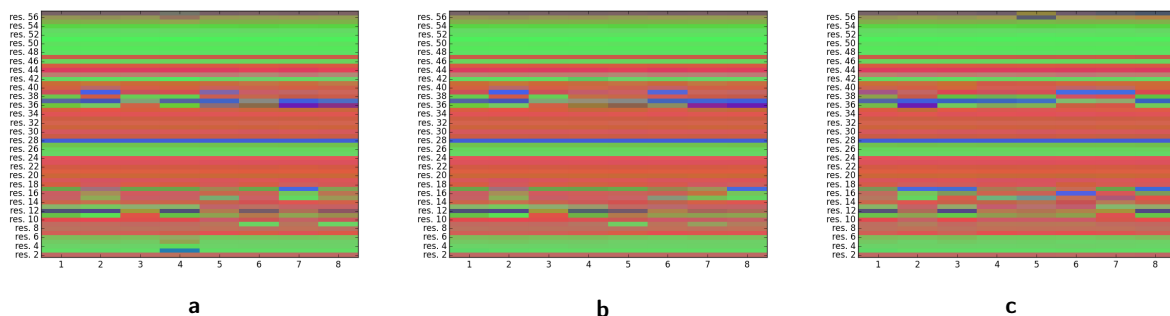

Figure S7: Dihedral angle content for BPTI after: primitive clustering (a), density-based geometric microstate generation and successive dynamical clustering via MPP (b) and density-based geometric clustering without dynamical corrections (c).
